# Supplementary material for: Egg Yolk IgY: A Novel Trend of Feed Additives to Limit Drugs and to Improve Poultry Meat Quality
Source: Front Vet Sci. 2020 Jul 14;7:350. doi: 10.3389/fvets.2020.00350 (PMC7371932; doi:10.3389/fvets.2020.00350)
Supplement: Supplementary file 1 [file Data_Sheet_1.docx]

**SUPPLEMENTARY MATERIAL**

**Egg Yolk IgY: A novel Trend of Feed Additives to Limit Drugs and to Improve Poultry Meat Quality**

**Running Title: IgY-technology Improves the Meat Quality**

***Mohamed A. Hussein1, Ibrahim F. Rehan2*, Ahmed F. Rehan1, Nesreen Z. Eleiwa3, Mootaz A. M. Abdel-Rahman4, Sohaila G. Fahmy5, Ahmed S. Ahmed6, Mohammed Youssef7, Hassan M. Diab8, Gaber E. Batiha9, Sara T. Alrashood10, Haseeb A. Khan11, Obeid Shanab12, Eslam Ahmed5, Hamdy Hassan13, Asmaa Elnagar14, Amr Elkelish15, Abd El-Latif Hesham16and Mohamed A. Maky17****

1 Department of Food Control, Faculty of Veterinary Medicine, Zagazig University, Zagazig, Egypt.

2 Department of Husbandry and Development of Animal Wealth, Faculty of Veterinary Medicine, Menofia University, Shebin Alkom, Menofia, Egypt.

3 Department of Food Hygiene, Animal Health Research Institute, Agricultural Research Center, Giza, Egypt.

4 Department of Behavior, Management and Development of Animal Wealth, Faculty of Veterinary Medicine, Minia University, El-Minia, Egypt.

5 Department of Animal Behaviour and Management, Faculty of Veterinary Medicine, South Valley University, Qena, Egypt.

6 Department of Food Hygiene and Control (Milk Hygiene), Faculty of Veterinary Medicine, South Valley University, Qena, Egypt.

7 Department of Animal Physiology, Faculty of Veterinary Medicine, South Valley University, Qena, Egypt.

8 Department of Animal and Poultry Health and Environment, Faculty of Veterinary Medicine, South Valley University, Qena, Egypt.

9 Department of Pharmacology and Therapeutics, Faculty of Veterinary Medicine, Damanhour University, Damanhour, Al Beheira, Egypt.

10 Department of Pharmaceutical Chemistry, College of Pharmacy, King Saud University, Riyadh, Saudi Arabia.

11 Department of Biochemistry, College of Science, King Saud University, Riyadh, Saudi Arabia.

12 Department of Biochemistry, Faculty of Veterinary Medicine, South Valley University, Qena, Egypt.

13 Department of Animal Production, Faculty of Agriculture, South Valley University, Qena, Egypt.

14 Department of Biochemistry, Faculty of Veterinary Medicine, Zagazig University, Zagazig, Egypt.

15 Department of Botany, Faculty of Science, Suez Canal University, Ismailia, Egypt.

16 Department of Genetics, Faculty of Agriculture, Beni-Suef University, Beni-Suef, Egypt.

17 Department of Food Hygiene and Control (Meat Hygiene), Faculty of Veterinary Medicine, South Valley University, Qena, Egypt.

***Corresponding authors**: Ibrahim F. Rehan ([ibrahim.rehan@vet.menofia.edu.eg](mailto:ibrahim.rehan@vet.menofia.edu.eg)) and Mohamed A. Maky ([mohamedmekky@vet.svu.edu.eg](mailto:mohamedmekky@vet.svu.edu.eg)).

**TABLE S1** The chemical compostion of the diet.

| **Ingredients** | **Ration** | | |
| --- | --- | --- | --- |
| **Starter** | **Grower** | **Finisher** |
| **Crude protein (%)** | 23 | 21 | 19 |
| **Crude fat (%)** | 5.92 | 6.62 | 6.86 |
| **ME (kcal/kg)** | 3020 | 3100 | 3200 |
| **Crude fiber (%)** | 3.76 | 3.46 | 3.2 |

**TABLE S2** The statistics of weights gain (g) of chick broiler supplemented with variant feed additives.

| **No.** | **Group** | **WG**  **(week-1)** | **WG**  **(week-2)** | **WG**  **(week-3)** | **WG**  **(week-4)** | **WG (week-5)** | **WG**  **(week-6)** |
| --- | --- | --- | --- | --- | --- | --- | --- |
| **1** | **CNT** | 86.3 ± 5.9 | 166 ± 21.2 | 375.7 ± 24.2 | 429 ± 24.8 | 503 ± 14.8 | 490.3 ± 26.4 |
| **2** | **Probiotic** | 84.6 ± 2.7 | 203.7 ± 17.06 | 398.6 ± 11.6 | 422.4± 10.5 | 498.2± 28.4 | 513.4 ± 16.3 |
| **3** | **IgY** | 87 ± 6.07 | 179.7 ± 13.1 | 389 ± 11.8 | 467± 26.7 | 486.7 ± 61.9 | 506.2 ± 64.2 |
| **4** | **Probiotic + IgY** | 86.6 ± 4.2 | 219.7 ± 8.6* | 388 ± 16.7 | 483.6 ± 10.06* | 520.5 ± 62.6 | 506.4 ± 36.5 |
| *The result was presented as mean ± SEM and analyzed using one-way ANOVA. WG: weight gain; CNT: control group; IgY: immunoglobulin Y; (*), P < 0.05.* | | | | | | | |

**TABLE S3** The mean values of feed intake (g) of chick broiler supplemented with variant feed additives.

| **No.** | **Group** | **FI (week-1)** | **FI (week-2)** | **FI (week-3)** | **FI (week-4)** | **FI (week-5)** | **FI (week-6)** |
| --- | --- | --- | --- | --- | --- | --- | --- |
| **1** | **CNT** | 181 ± 22.1 | 340 ± 42.2 | 502.3 ± 74.3 | 569.3 ± 75.4 | 906 ± 135.2 | 900 ± 115.2 |
| **2** | **Probiotic** | 180.6 ± 19.3 | 349.3 ± 44.1 | 508.3 ± 76.4 | 572.6 ± 77.1 | 842.3 ± 116.3 | 904.6 ± 117.3 |
| **3** | **IgY** | 176.6 ± 15.7 | 356.6 ± 50.2 | 531.3 ± 74.1 | 604.3 ± 88.2 | 875.3 ± 122.4 | 961.3 ± 134.1 |
| **4** | **Probiotic + IgY** | 182.3 ± 22.4 | 356.6 ± 51.4 | 482.6 ± 66.7 | 610 ± 90.3 | 831 ± 111.7 | 952.6 ± 122.7 |
| *The result was presented as mean ± SEM and analyzed using one-way ANOVA. FI: feed intake; CNT: control group; IgY: immunoglobulin Y.* | | | | | | | |

**TABLE S4** The feed conversion ratio of chick broiler supplemented with variant feed additives.

| **No.** | **Group** | **FCR** | **FCR** | **FCR** | **FCR** | **FCR** | **FCR** |
| --- | --- | --- | --- | --- | --- | --- | --- |
| **(week-1)** | **(week-2)** | **(week-3)** | **(week-4)** | **(week-5)** | **(week-6)** |
| **1** | **CNT** | 2.09 ± 0.21 | 2.04 ± 0.16 | 1.33 ± 0.1 | 1.32 ± 0.11 | 1.8 ± 0.15 | 1.83 ± 0.11 |
| **2** | **Probiotic** | 2.13 ± 0.17 | 1.71 ± 0.12 | 1.27 ± 0.09 | 1.35 ± 0.09 | 1.69 ± 0.13 | 1.76 ± 0.1 |
| **3** | **IgY** | 2.02 ± 0.15 | 1.98 ± 0.14 | 1.36 ± 0.05 | 1.29 ± 0.08 | 1.79 ± 0.12 | 1.89 ± 0.12 |
| **4** | **Probiotic + IgY** | 2.1 ± 0.16 | 1.62 ± 0.11 | 1.24 ±0.09 | 1.26 ± 0.09 | 1.59 ± 0.11 | 1.88 ± 0.13 |
| *The result was presented as mean ± SEM and analyzed using one-way ANOVA. FCR: feed conversion ratio; CNT: control group; IgY: immunoglobulin Y.* | | | | | | | |

**TABLE S5** Calculation of mortality percentage of chicken broilers (n=10) during the experiment.

| **No.** | **Group** | **Day** | **Dead** | **Mortality %** |
| --- | --- | --- | --- | --- |
| **1** | **Control** | 7 | 1 | 20 |
| 34 | 1 |
| **2** | **Probiotic** | ─ | ─ | 0 |
| **3** | **IgY** | ─ | ─ | 0 |
| **4** | **Probiotic + IgY** | ─ | ─ | 0 |
| *IgY: immunoglobulin. (─): not detected.* | | | | |

**TABLE S6** Average weights (g) of ration and feed additive (n=10) consumed per bird in the experiment.

| **No.** | **Group** | **W (g)/ bird** | |
| --- | --- | --- | --- |
| **Ration** | **Feed additive** |
| **1** | **Control** | 3398.6 | ─ |
| **2** | **Probiotic** | 3357.7 | 1.68 |
| **3** | **IgY** | 3505.4 | 1.75 |
| **4** | **Probiotic + IgY** | 3415.1 | 0.85 + 0.85 |
| *IgY: immunoglobulin; W: weight. (─): not given.* | | | |

**TABLE S7** Effect of various feed additives on economic values ($) of broiler farms in experimental groups.

| **No.** | **Group** | **Cost/bird ($)** | | | | | | | | | **Total cost/bird** | **Total return/bird** | | **Net profit/bird** |
| --- | --- | --- | --- | --- | --- | --- | --- | --- | --- | --- | --- | --- | --- | --- |
| **Chick** | **Ration** | **Feed additives preparation** | **Drugs** | **Vaccines** | **Disinfectant** | **Bedding** | **Supervision** | **Building** |  | **Poultry sale** | **Litter sale** | **(Total return-Total cost)** |
|  | **& equipment** | **($)** | **($)** | **($)** | **($)** |
| **1** | **Control** | 0.24 | 1.33 | ─ | 0.18 | 0.06 | 0.015 | free | 0.03 | free | 1.855 | 2.263 | 0.018 | (2.281-1.855) = 0.43 |
| **2** | **Probiotic** | 0.24 | 1.28 | 0.00078 | ─ | 0.06 | 0.015 | free | 0.03 | free | 1.626 | 2.335 | 0.018 | (2.353-1.626) = 0.73 |
| **3** | **IgY** | 0.24 | 1.37 | 0.0013 | ─ | 0.06 | 0.015 | free | 0.03 | free | 1.716 | 2.328 | 0.018 | (2.346-1.716) = 0.63 |
| **4** | **Probiotic + IgY** | 0.24 | 1.34 | 0.0004+0.00063 | ─ | 0.06 | 0.015 | free | 0.03 | free | 1.686 | 2.429 | 0.018 | (2.447-1.686) = 0.76 |
| *The data was obtained in Egypt on 2019. IgY: immunoglobulin;* *$: U.S dollar; free: freely available at the faculty farm. (* ─*): not given.We have to notice that the price of 1kg ration costed 0.39$, 1kg probiotic costed 0.47$ and 1kg IgY costed 0.75$ so the calculation in this table was estimated accodingly (e.g., 1 U.S. Dollar =17.80 Egyptian pound).* | | | | | | | | | | | | | | |

**
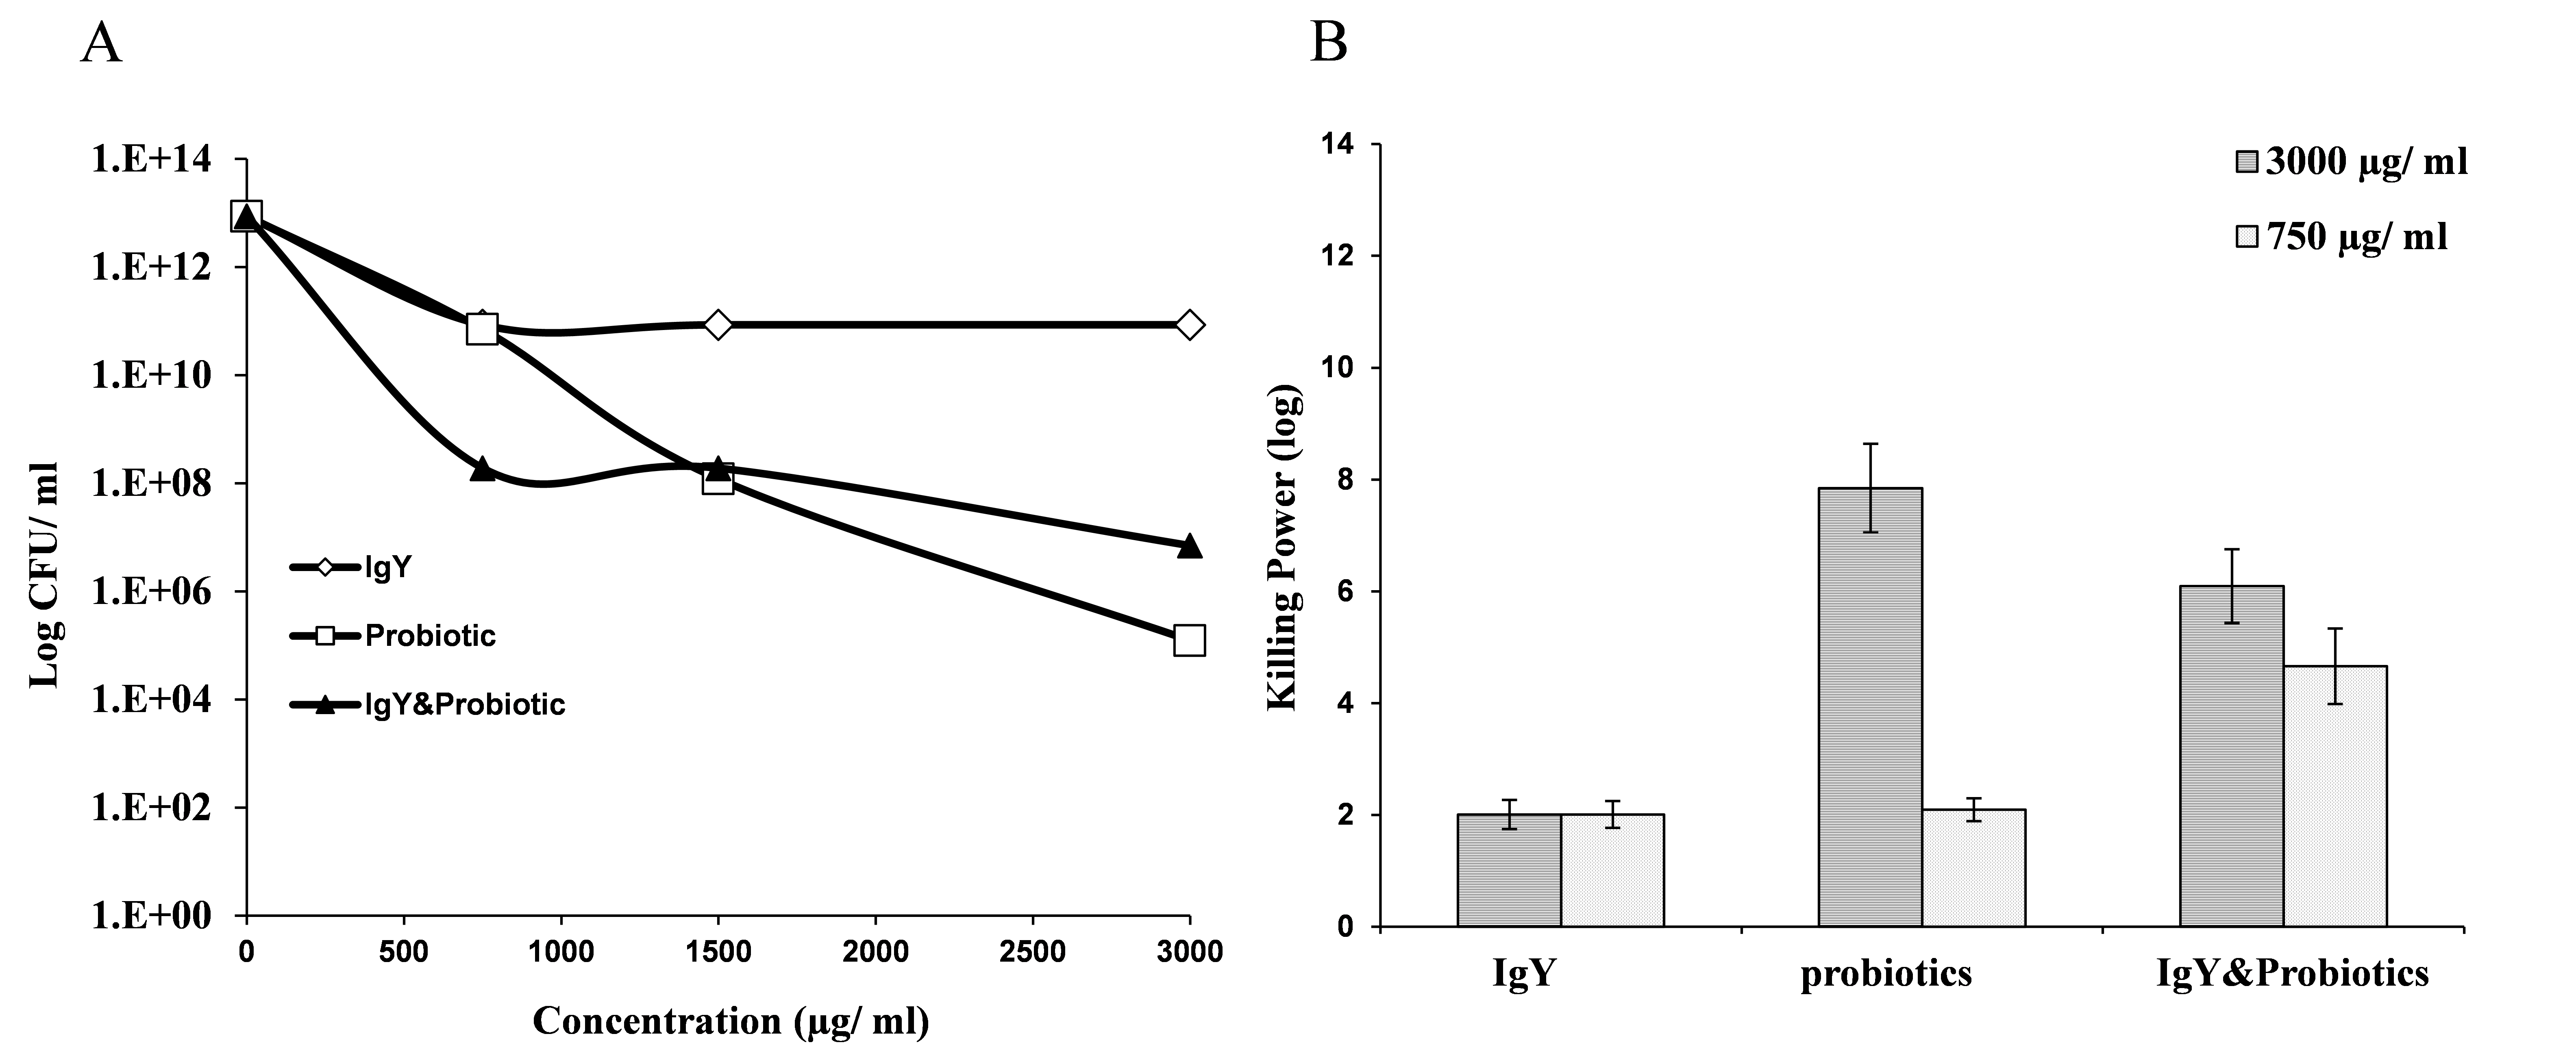
**

**FIGURE S1 (A)** Antibacterial activity of IgY, probiotic and the mixture of both against Escherichia coli at different concentrations; **(B)** Log10 of antibacterial activity for the same groups at two concentration of 750 µg/ ml and 3000 µg/ ml against E.coli.

**
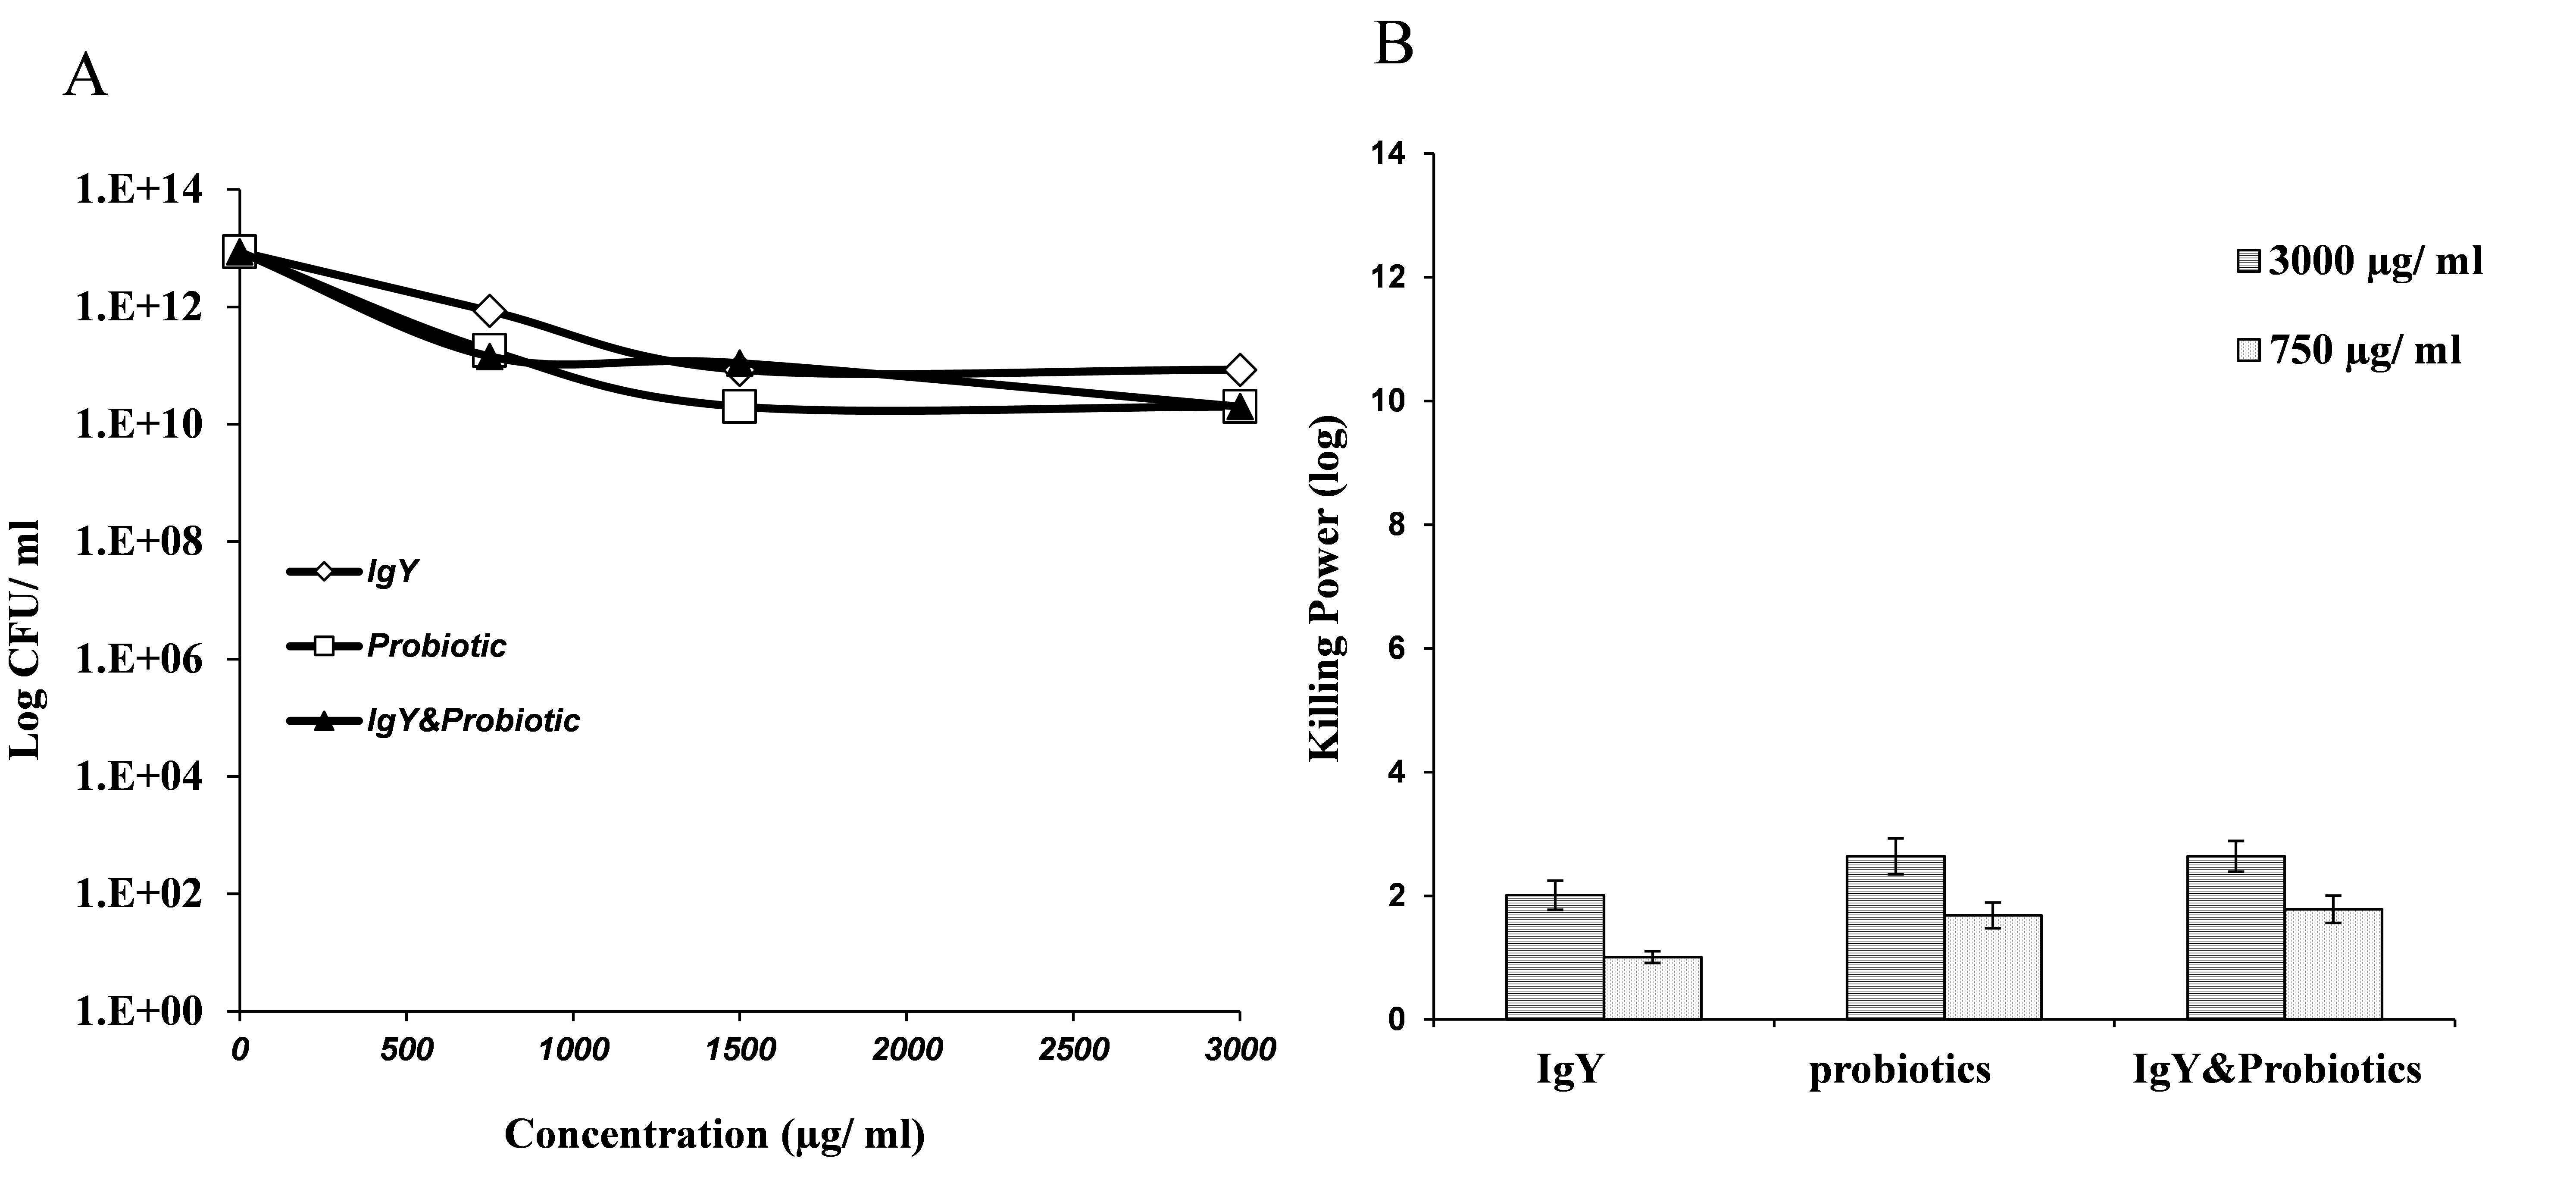
FIGURE S2 (A)** Antibacterial activity of IgY, probiotic and the mixture of both against Salmonella typhimurium at different concentrations; **(B)** Log10 of antibacterial activity for the same groups at two concentration of 750 µg/ ml and 3000 µg/ ml against S.typhimurium.
